# Sampling networks of ecological interactions

Pedro Jordano<sup>\*a</sup>

<sup>a</sup>Integrative Ecology Group, Estación Biológica de Doñana, Consejo Superior de Investigaciones Científicas (EBD-CSIC), Avenida Americo Vesputio s/n, E-41092 Sevilla, Spain

Sevilla, September 5, 2015

## Summary

1. Sampling ecological interactions presents similar challenges, problems, potential biases, and constraints as sampling individuals and species in biodiversity inventories. Interactions are just pairwise relationships among individuals of two different species, such as those among plants and their seed dispersers in frugivory interactions or those among plants and their pollinators. Sampling interactions is a fundamental step to build robustly estimated interaction networks, yet few analyses have attempted a formal approach to their sampling protocols.

---

\*jordano@ebd.csic.es

2. Robust estimates of the actual number of interactions (links) within diversified ecological networks require adequate sampling effort that needs to be explicitly gauged. Yet we still lack a sampling theory explicitly focusing on ecological interactions.
3. While the complete inventory of interactions is likely impossible, a robust characterization of its main patterns and metrics is probably realistic. We must acknowledge that a sizable fraction of the maximum number of interactions  $I_{max}$  among, say,  $A$  animal species and  $P$  plant species (i.e.,  $I_{max} = AP$ ) is impossible to record due to forbidden links, i.e., life-history restrictions. Thus, the number of observed interactions  $I$  in robustly sampled networks is typically  $I \ll I_{max}$ , resulting in extremely sparse interaction matrices with low connectance.
4. Reasons for forbidden links are multiple but mainly stem from spatial and temporal uncoupling, size mismatches, and intrinsically low probabilities of interspecific encounter for most potential interactions of partner species. Adequately assessing the completeness of a network of ecological interactions thus needs knowledge of the natural history details embedded, so that forbidden links can be “discounted” when addressing sampling effort.
5. Here I provide a review and outline a conceptual framework for interaction sampling by building an explicit analogue to individuals and species sampling, thus extending diversity-monitoring approaches to the characterization of complex networks of ecological interactions. This is crucial to assess the fast-paced and devastating effects of defaunation-driven loss of key ecological interactions and the services they provide and the analogous losses related

Jordano - Sampling networks

to interaction gains due to invasive species and biotic homogenization.

## Keywords

complex networks, food webs, frugivory, mutualism, plant-animal interactions, pollination, seed dispersal

## Introduction

Biodiversity sampling is a labour-intensive activity, and sampling is often not sufficient to detect all or even most of the species present in an assemblage. Gotelli & Colwell (2011).

1 Biodiversity species assessment aims at sampling individuals in collections and  
2 determining the number of species represented. Given that, by definition, samples  
3 are incomplete, these collections do not enumerate the species actually present.  
4 The ecological literature dealing with robust estimators of species richness and di-  
5 versity in collections of individuals is immense, and a number of useful approaches  
6 have been used to obtain such estimates (Magurran, 1988; Gotelli & Colwell, 2001;  
7 Colwell, Mao & Chang, 2004; Hortal, Borges & Gaspar, 2006; Colwell, 2009; Gotelli  
8 & Colwell, 2011; Chao *et al.*, 2014). Recent effort has been also focused at defining  
9 essential biodiversity variables (EBV) (Pereira *et al.*, 2013) that can be sampled  
10 and measured repeatedly to complement biodiversity estimates. Yet sampling  
11 species or taxa-specific EBVs is just probing a single component of biodiversity;  
12 interactions among species are another fundamental component, one that supports

13 the existence, but in some cases also the extinction, of species. For example, the ex-  
14 tinction of interactions represents a dramatic loss of biodiversity because it entails  
15 the loss of fundamental ecological functions (Valiente-Banuet *et al.*, 2014). This  
16 missed component of biodiversity loss, the extinction of ecological interactions,  
17 very often accompanies, or even precedes, species disappearance. Interactions  
18 among species are a key component of biodiversity and here we aim to show that  
19 most problems associated with sampling interactions in natural communities relate  
20 to problems associated with sampling species diversity, even worse. We consider  
21 pairwise interactions among species at the habitat level, in the context of alpha di-  
22 versity and the estimation of local interaction richness from sampling data (Chao  
23 *et al.*, 2014). In the first part we provide a succinct overview of previous work  
24 addressing sampling issues for ecological interaction networks. In the second part,  
25 after a short overview of asymptotic diversity estimates (Gotelli & Colwell, 2001),  
26 we discuss specific rationales for sampling the biodiversity of ecological interac-  
27 tions. Most of the examples come from the analysis of plant-animal interaction  
28 networks, yet are applicable to other types of species-species interactions.

29 Interactions can be a much better indicator of the richness and diversity of  
30 ecosystem functions than a simple list of taxa and their abundances and/or related  
31 biodiversity indicator variables (EBVs). Thus, sampling interactions should be a  
32 central issue when identifying and diagnosing ecosystem services (e.g., pollination,  
33 natural seeding by frugivores, etc.). Fortunately, the whole battery of biodiversity-  
34 related tools used by ecologists to sample biodiversity (species, *sensu stricto*) can  
35 be extended and applied to the sampling of interactions. Analogs are evident  
36 between these approaches (see Table 2 in Colwell, Mao & Chang, 2004). Monitor-  
37 ing interactions is a biodiversity sampling and is subject to similar methodological

38 shortcomings, especially under-sampling (Jordano, 1987; Jordano, Vázquez & Bas-  
39 compte, 2009; Coddington *et al.*, 2009; Vázquez, Chacoff & Cagnolo, 2009; Dorado  
40 *et al.*, 2011; Rivera-Hutinel *et al.*, 2012). For example, when we study mutualistic  
41 networks, our goal is to make an inventory of the distinct pairwise interactions  
42 that made up the network. We are interested in having a complete list of all the  
43 pairwise interactions among species (e.g., all the distinct, species-species interac-  
44 tions, or links, among the pollinators and flowering plants) that do actually exist  
45 in a given community. Sampling these interactions thus entails exactly the same  
46 problems, limitations, constraints, and potential biases as sampling individual or-  
47 ganisms and species diversity. As Mao & Colwell (2005) put it, these are the  
48 workings of Preston’s demon, the moving “veil line” (Preston, 1948) between the  
49 detected and the undetected interactions as sample size increases.

50 Early efforts to recognize and solve sampling problems in analyses of interac-  
51 tions stem from research on food webs and to determine how undersampling biases  
52 food web metrics (Martinez, 1991; Cohen *et al.*, 1993; Martinez, 1993; Bersier,  
53 Banasek-Richter & Cattin, 2002; Brose, Martinez & Williams, 2003; Banasek-  
54 Richter, Cattin & Bersier, 2004; Wells & O’Hara, 2012). In addition, the myriad  
55 of classic natural history studies documenting animal diets, host-pathogen infection  
56 records, plant herbivory records, etc., represent efforts to document interactions  
57 occurring in nature. All of them share the problem of sampling incompleteness in-  
58 fluencing the patterns and metrics reported. Yet, despite the early recognition that  
59 incomplete sampling may seriously bias the analysis of ecological networks (Jor-  
60 dano, 1987), only recent studies have explicitly acknowledged it and attempted to  
61 determine its influence (Ollerton & Cranmer, 2002; Nielsen & Bascompte, 2007;  
62 Vázquez, Chacoff & Cagnolo, 2009; Gibson *et al.*, 2011; Olesen *et al.*, 2011; Chacoff

Jordano - Sampling networks

63 *et al.*, 2012; Rivera-Hutinel *et al.*, 2012; Olito & Fox, 2014; Bascompte & Jordano,  
64 2014; Vizentin-Bugoni, Maruyama & Sazima, 2014; Frund, McCann & Williams,  
65 2015). The sampling approaches have been extended to predict patterns of coex-  
66 tintions in interaction assemblages (e.g., hosts-parasites) (Colwell, Dunn & Harris,  
67 2012). Most empirical studies provide no estimate of sampling effort, implicitly  
68 assuming that the reported network patterns and metrics are robust. Yet recent ev-  
69 idences point out that number of partner species detected, number of actual links,  
70 and some aggregate statistics describing network patterns, are prone to sampling  
71 bias (Nielsen & Bascompte, 2007; Dorado *et al.*, 2011; Olesen *et al.*, 2011; Chacoff  
72 *et al.*, 2012; Rivera-Hutinel *et al.*, 2012; Olito & Fox, 2014; Frund, McCann &  
73 Williams, 2015). Most of these evidences, however, come either from simulation  
74 studies (Frund, McCann & Williams, 2015) or from relatively species-poor assem-  
75 blages. Most certainly, sampling limitations pervade biodiversity inventories in  
76 tropical areas (Coddington *et al.*, 2009) and we might rightly expect that frequent  
77 interactions may be over-represented and rare interactions may be missed entirely  
78 in studies of mega-diverse assemblages (Bascompte & Jordano, 2014); but, to what  
79 extent?

## 80 **Sampling interactions: methods**

81 When we sample interactions in the field we record the presence of two species  
82 that interact in some way. For example, Snow and Snow(1988) recorded an inter-  
83 action whenever they saw a bird “touching” a fruit on a plant. We observe and  
84 record feeding observations, visitation, occupancy, presence in pollen loads or in  
85 fecal samples, etc., of *individual* animals or plants and accumulate pairwise inter-

86 actions, i.e., lists of species partners and the frequencies with which we observe  
87 them. Therefore, estimating the sampling completeness of pairwise interactions for  
88 a whole network, requires some gauging of how the number (richness) of distinct  
89 pairwise interactions accumulates as sampling effort is increased) and/or estimat-  
90 ing the uncertainty around the missed links (Wells & O’Hara, 2012).

91 Most types of ecological interactions can be illustrated with bipartite graphs,  
92 with two or more distinct groups of interacting partners (Bascompte & Jordano,  
93 2014); for illustration purposes I’ll focus more specifically on plant-animal inter-  
94 actions. Sampling interactions requires filling the cells of an interaction matrix  
95 with data. The matrix,  $\Delta = AP$  (the adjacency matrix for the graph representa-  
96 tion of the network), is a 2D inventory of the interactions among, say,  $A$  animal  
97 species (rows) and  $P$  plant species (columns) (Jordano, 1987; Bascompte & Jor-  
98 dano, 2014). The matrix entries illustrate the values of the pairwise interactions  
99 visualized in the  $\Delta$  matrix, and can be 0 or 1, for presence-absence of a given  
100 pairwise interaction, or take a quantitative weight  $w_{ji}$  to represent the interaction  
101 intensity or unidirectional effect of species  $j$  on species  $i$  (Bascompte & Jordano,  
102 2014; Vazquez *et al.*, 2015). The outcomes of most ecological interactions are  
103 dependent on frequency of encounters (e.g., visit rate of pollinators, number of  
104 records of ant defenders, frequency of seeds in fecal samples). Thus, a frequently  
105 used proxy for interaction intensities  $w_{ji}$  is just how frequent new interspecific  
106 encounters are, whether or not appropriately weighted to estimate interaction ef-  
107 fectiveness (Vazquez, Morris & Jordano, 2005).

108 We need to define two basic steps in the sampling of interactions: 1) which  
109 type of interactions we sample; and 2) which type of record we get to document  
110 the existence of an interaction. In step #1 we need to take into account whether

Jordano - Sampling networks

111 we are sampling the whole community of interactor species (all the animals, all  
112 the plants) or just a subset of them, i.e., a sub matrix  $\Delta_{m,n}$  of  $m < A$  animal  
113 species and  $n < P$  plant species of the adjacency matrix  $\Delta_{AP}$  (i.e., the matrix  
114 representation of interactions among the partner species). Subsets can be: a) all  
115 the potential plants interacting with a subset of the animals (Fig. 1a); b) all the  
116 potential animal species interacting with a subset of the plant species (Fig. 1b);  
117 c) a subset of all the potential animal species interacting with a subset of all the  
118 plant species (Fig. 1c). While some discussion has considered how to establish  
119 the limits of what represents a network (Strogatz, 2001) (in analogy to discussion  
120 on food-web limits; Cohen, 1978), it must be noted that situations a-c in Fig.  
121 1 do not represent complete interaction networks. As vividly stated by Cohen  
122 *et al.* (1993): “*As more comprehensive, more detailed, more explicit webs become*  
123 *available, smaller, highly aggregated, incompletely described webs may progressively*  
124 *be dropped from analyses of web structure (though such webs may remain useful for*  
125 *other purposes, such as pedagogy)*”. Subnet sampling is generalized in studies of  
126 biological networks (e.g., protein interactions, gene regulation), yet it is important  
127 to recognize that most properties of subnetworks (even random subsamples) do  
128 not represent properties of whole networks (Stumpf, Wiuf & May, 2005).

129 In step #2 above we face the problem of the type of record we take to sample  
130 interactions. This is important because it defines whether we approach the problem  
131 of filling up the interaction matrix in a “zoo-centric” way or in a “phyto-centric”  
132 way. Zoo-centric studies directly sample animal activity and document the plants  
133 ‘touched’ by the animal. For example, analysis of pollen samples recovered from the  
134 body of pollinators, analysis of fecal samples of frugivores, radio-tracking data, etc.  
135 Phyto-centric studies take samples of focal individual plant species and document



136 which animals ‘arrive’ or ‘touch’ the plants. Examples include focal watches of  
137 fruiting or flowering plants to record visitation by animals, raising insect herbivores  
138 from seed samples, identifying herbivory marks in samples of leaves, etc.

139 Most recent analyses of plant-animal interaction networks are phyto-centric;  
140 just 3.5% of available plant-pollinator ( $N= 58$ ) or 36.6% plant-frugivore ( $N= 22$ )  
141 interaction datasets are zoo-centric (see Schleuning *et al.*, 2012). Moreover, most  
142 available datasets on host-parasite (parasitoid) or plant-herbivore interactions are  
143 “host-centric” or phyto-centric (e.g., Thébault & Fontaine, 2010; Morris *et al.*,  
144 2013; Eklöf *et al.*, 2013). This may be related to a variety of causes, like preferred  
145 methodologies by researchers working with a particular group or system, logistic  
146 limitations, or inherent taxonomic focus of the research questions. A likely result  
147 of phyto-centric sampling would be adjacency matrices with large  $A : P$  ratios.  
148 In any case we don’t have a clear view of the potential biases that taxa-focused  
149 sampling may generate in observed network patterns, for example by generating  
150 consistently asymmetric interaction matrices (Dormann *et al.*, 2009). System sym-  
151 metry has been suggested to influence estimations of generalization levels in plants  
152 and animals when measured as  $I_A$  and  $I_P$  (Elberling & Olesen, 1999); thus, differ-  
153 ences in  $I_A$  and  $I_P$  between networks may arise from different  $A : P$  ratios rather  
154 than other ecological factors (Olesen & Jordano, 2002).

155 Reasonably complete analyses of interaction networks can be obtained when  
156 combining both phyto-centric and zoo-centric sampling. For example, Bosch *et al.*  
157 (2009) showed that the addition of pollen load data on top of focal-plant sampling  
158 of pollinators unveiled a significant number of interactions, resulting in important  
159 network structural changes. Connectance increased 1.43-fold, mean plant connec-  
160 tivity went from 18.5 to 26.4, and mean pollinator connectivity from 2.9 to 4.1;

Jordano - Sampling networks

161 moreover, extreme specialist pollinator species (singletons in the adjacency matrix)  
162 decreased 0.6-fold. Olesen *et al.*(2011) identified pollen loads on sampled insects  
163 and added the new links to an observation-based visitation matrix, with an extra  
164 5% of links representing the estimated number of missing links in the pollination  
165 network. The overlap between observational and pollen-load recorded links was  
166 only 33%, underscoring the value of combining methodological approaches. Zoo-  
167 centric sampling has recently been extended with the use of DNA-barcoding, for  
168 example with plant-herbivore (Jurado-Rivera *et al.*, 2009), host-parasitoid (Wirta  
169 *et al.*, 2014), and plant-frugivore interactions (González-Varo, Arroyo & Jordano,  
170 2014). For mutualistic networks we would expect that zoo-centric sampling could  
171 help unveiling interactions of the animals with rare plant species or for relatively  
172 common plants species which are difficult to sample by direct observation. Fu-  
173 ture methodological work may provide significant advances showing how mixing  
174 different sampling strategies strengthens the completeness of network data. These  
175 mixed strategies may combine, for instance, timed watches at focal plants, spot  
176 censuses along walked transects, pollen load or seed contents analyses, monitoring  
177 with camera traps, and DNA barcoding records. We might expect increased power  
178 of these mixed sampling approaches when combining different methods from both  
179 phyto- and zoo-centric perspectives (Bosch *et al.*, 2009; Blüthgen, 2010). Note also  
180 that the different methods could be applied in different combinations to the two  
181 distinct sets of species. However, there are no tested protocols and/or sampling  
182 designs for ecological interaction studies to suggest an optimum combination of  
183 approaches. Ideally, pilot studies would provide adequate information for each  
184 specific study setting.

## 185 Sampling interactions: rationale

186 The number of distinct pairwise interactions that we can record in a landscape  
187 (an area of relatively homogeneous vegetation, analogous to the one we would  
188 use to monitor species diversity) is equivalent to the number of distinct classes in  
189 which we can classify the recorded encounters among *individuals* of two different  
190 species. Yet, individual-based interaction networks have been only recently studied  
191 (Dupont, Trøjelsgaard & Olesen, 2011; Wells & O’Hara, 2012). The most usual  
192 approach has been to pool individual-based interaction data into species-based  
193 summaries, an approach that ignores the fact that only a fraction of individuals  
194 may actually interact given a per capita interaction effect (Wells & O’Hara, 2012).  
195 Wells & O’Hara (2012) illustrate the pros and cons of the approach. We walk in  
196 the forest and see a blackbird  $Tm$  picking an ivy  $Hh$  fruit and ingesting it: we  
197 have a record for  $Tm - Hh$  interaction. We keep advancing and record again a  
198 blackbird feeding on hawthorn  $Cm$  fruits so we record a  $Tm - Cm$  interaction;  
199 as we advance we encounter another ivy plant and record a blackcap swallowing a  
200 fruit so we now have a new  $Sa - Hh$  interaction, and so on. At the end we have  
201 a series of classes (e.g.,  $Sa - Hh$ ,  $Tm - Hh$ ,  $Tm - Cm$ , etc.), along with their  
202 observed frequencies. Bunge & Fitzpatrick (1993) provide an early review of the  
203 main aspects and approaches to estimate the number of distinct classes  $C$  in a  
204 sample of observations.

205 Our sampling above would have resulted in a vector  $n = [n_1 \dots n_C]'$  where  $n_i$  is  
206 the number of records in the  $i^{th}$  class. As stressed by Bunge & Fitzpatrick (1993),  
207 however, the  $i^{th}$  class would appear in the sample if and only if  $n_i > 0$ , and we  
208 don’t know *a priori* which  $n_i$  are zero. So,  $n$  is not observable. Rather, what we

Jordano - Sampling networks

209 get is a vector  $c = [c_1 \dots c_n]'$  where  $c_j$  is the number of classes represented  $j$  times  
210 in our sampling:  $c_1$  is the number of singletons (interactions recorded once),  $c_2$   
211 is the number of twin pairs (interactions with just two records),  $c_3$  the number  
212 of triplets, etc. The problem thus turns to be estimating the number of distinct  
213 classes  $C$  from the vector of  $c_j$  values and the frequency of unobserved interactions  
214 (see “The real missing links” below).

215 More specifically, we usually obtain a type of reference sample (Chao *et al.*,  
216 2014) for interactions: a series of replicated samples (e.g., observation days, 1h  
217 watches, etc.) with quantitative information, i.e., recording the number of in-  
218 stances of each interaction type on each day. This replicated abundance data,  
219 can be treated in three ways: 1) Abundance data within replicates: the counts  
220 of interactions, separately for each day; 2) Pooled abundance data: the counts of  
221 interactions, summed over all days (the most usual approach); and 3) Replicated  
222 incidence data: the number of days on which we recorded each interaction. Assum-  
223 ing a reasonable number of replicates, replicated incidence data is considered the  
224 most robust statistically, as it takes account of heterogeneity among days (Colwell,  
225 Mao & Chang, 2004; Colwell, Dunn & Harris, 2012; Chao *et al.*, 2014). Thus, both  
226 presence-absence and weighted information on interactions can be accommodated  
227 for this purpose.

## 228 **The species assemblage**

229 When we consider an observed and recorded sample of interactions on a particular  
230 assemblage of  $A_{obs}$  and  $P_{obs}$  species (or a set of replicated samples) as a reference  
231 sample (Chao *et al.*, 2014) we may have three sources of undersampling error that

232 are ignored by treating a reference sample as a true representation of the inter-  
233 actions in well-defined assemblage: 1) some animal species are actually present  
234 but not observed (zero abundance or incidence in the interactions in the reference  
235 sample),  $A_0$ ; 2) some plant species are actually present but not observed (zero  
236 abundance or incidence in the interactions in the reference sample),  $P_0$ ; 3) some  
237 unobserved links (the zeroes in the adjacency matrix,  $UL$ ) may actually occur but  
238 not recorded. Thus a first problem is determining if  $A_{obs}$  and  $P_{obs}$  truly represent  
239 the actual species richness interacting in the assemblage. To this end we might use  
240 the replicated reference samples to estimate the true number of interacting animal  
241  $A_{est}$  and plant  $P_{est}$  species as in traditional diversity estimation analysis (Chao  
242 *et al.*, 2014). If there are no uniques (species seen on only one day), then  $A_0$  and  
243  $P_0$  will be zero, and we have  $A_{obs}$  and  $P_{obs}$  as robust estimates of the actual species  
244 richness of the assemblage. If  $A_0$  and  $P_0$  are not zero they estimate the minimum  
245 number of undetected animal and plant species that can be expected with a suf-  
246 ficiently large number of replicates, taken from the same assemblage/locality by  
247 the same methods in the same time period. We can use extrapolation methods  
248 (Colwell, Dunn & Harris, 2012) to estimate how many additional replicate surveys  
249 it would take to reach a specified proportion  $g$  of  $A_{est}$  and  $P_{est}$ .

## 250 **The interactions**

251 We are then faced with assessing the sampling of interactions  $I$ . Table 1 summa-  
252 rizes the main components and targets for estimation of interaction richness. In  
253 contrast with traditional species diversity estimates, sampling networks has the  
254 paradox that despite the potentially interacting species being present in the sam-

255 pled assemblage (i.e., included in the  $A_{obs}$  and  $P_{obs}$  species lists), some of their  
256 pairwise interactions are impossible to be recorded. The reason is forbidden links.  
257 Independently of whether we sample full communities or subset communities we  
258 face a problem: some of the interactions that we can visualize in the empty ad-  
259 jacency matrix  $\Delta$  will simply not occur. With a total of  $A_{obs}P_{obs}$  “potential” in-  
260 teractions (eventually augmented to  $A_{est}P_{est}$  in case we have undetected species),  
261 a fraction of them are impossible to record, because they are forbidden (Jordano,  
262 Bascompte & Olesen, 2003; Olesen *et al.*, 2011).

263 Our goal is to estimate the true number of non-null  $AP$  interactions, including  
264 interactions that actually occur but have not been observed ( $I_0$ ) from the repli-  
265 cated incidence frequencies of interaction types:  $I_{est} = I_{obs} + I_0$ . Note that  $I_0$   
266 estimates the minimum number of undetected plant-animal interactions that can  
267 be expected with a sufficiently large number of replicates, taken from the same  
268 assemblage/locality by the same methods in the same time period. Therefore  
269 we have two types of non-observed links:  $UL^*$  and  $UL$ , corresponding to the  
270 real assemblage species richness and to the observed assemblage species richness,  
271 respectively (Table 1).

272 Forbidden links are non-occurrences of pairwise interactions that can be ac-  
273 counted for by biological constraints, such as spatio-temporal uncoupling (Jordano,  
274 1987), size or reward mismatching, foraging constraints (e.g., accessibility) (Moré  
275 *et al.*, 2012), and physiological-biochemical constraints (Jordano, 1987). We still  
276 have extremely reduced information about the frequency of forbidden links in natu-  
277 ral communities (Jordano, Bascompte & Olesen, 2003; Stang *et al.*, 2009; Vázquez,  
278 Chacoff & Cagnolo, 2009; Olesen *et al.*, 2011; Ibanez, 2012; Maruyama *et al.*, 2014;  
279 Vizentin-Bugoni, Maruyama & Sazima, 2014) (Table 1). Forbidden links are thus

280 represented as structural zeroes in the interaction matrix, i.e., matrix cells that  
281 cannot get a non-zero value.

282 We might expect different types of  $FL$  to occupy different parts of the  $\Delta$  ma-  
283 trix, with missing cells due to phenological uncoupling,  $FL_P$ , largely distributed  
284 in the lower-right half  $\Delta$  matrix and actually missed links  $ML$  distributed in its  
285 central part (Olesen *et al.*, 2010). Yet, most of these aspects remain understud-  
286 ied. Therefore, we need to account for the frequency of these structural zeros in  
287 our matrix before proceeding. For example, most measurements of connectance  
288  $C = I/(AP)$  implicitly ignore the fact that by taking the full product  $AP$  in the  
289 denominator they are underestimating the actual connectance value, i.e., the frac-  
290 tion of actual interactions  $I$  relative to the *biologically possible* ones, not to the  
291 total maximum  $I_{max} = AP$ .

292 Our main problem then turns to estimate the number of true missed links,  
293 i.e., those that can't be accounted for by biological constraints and that might  
294 suggest undersampling. Thus, the sampling of interactions in nature, as the sam-  
295 pling of species, is a cumulative process. In our analysis, we are not re-sampling  
296 individuals, but interactions, so we made interaction-based accumulation curves.  
297 If an interaction-based curve suggests a robust sampling, it does mean that no  
298 new interactions are likely to be recorded, irrespectively of the species, as it is  
299 a whole-network sampling approach (N. Gotelli, pers. com.). We add new, dis-  
300 tinct, interactions recorded as we increase sampling effort (Fig. 2). We can obtain  
301 an Interaction Accumulation Curve ( $IAC$ ) analogous to a Species Curve ( $SAC$ )  
302 (see Supplementary Online Material): the observed number of distinct pairwise  
303 interactions in a survey or collection as a function of the accumulated number of  
304 observations or samples (Colwell, 2009).

## 305 Empirical data on Forbidden Links

306 Adjacency matrices are frequently sparse, i.e., they are densely populated with  
307 zeroes, with a fraction of them being structural (unobservable interactions) (Bas-  
308 compte & Jordano, 2014). Thus, it would be a serious interpretation error to  
309 attribute the sparseness of adjacency matrices for bipartite networks to undersam-  
310 pling. The actual typology of link types in ecological interaction networks is thus  
311 more complex than just the two categories of observed and unobserved interactions  
312 (Table 1). Unobserved interactions are represented by zeroes and belong to two  
313 categories. Missing interactions may actually exist but require additional sampling  
314 or a variety of methods to be observed. Forbidden links, on the other hand, arise  
315 due to biological constraints limiting interactions and remain unobservable in na-  
316 ture, irrespectively of sampling effort (Table 1). Forbidden links  $FL$  may actually  
317 account for a relatively large fraction of unobserved interactions  $UL$  when sam-  
318 pling taxonomically-restricted subnetworks (e.g., plant-hummingbird pollination  
319 networks) (Table 1). Phenological uncoupling is also prevalent in most networks,  
320 and may add up to explain ca. 25–40% of the forbidden links, especially in highly  
321 seasonal habitats, and up to 20% when estimated relative to the total number of un-  
322 observed interactions (Table 2). In any case, we might expect that a fraction of the  
323 missing links  $ML$  would be eventually explained by further biological reasons, de-  
324 pending on the knowledge of natural details of the particular systems. Our goal as  
325 naturalists would be to reduce the fraction of  $UL$  which remain as missing links; to  
326 this end we might search for additional biological constraints or increase sampling  
327 effort. For instance, habitat use patterns by hummingbirds in the Arima Valley  
328 network (Table 2; Snow & Snow, 1972) impose a marked pattern of microhabitat



Jordano - Sampling networks

329 mismatches causing up to 44.5% of the forbidden links. A myriad of biological  
330 causes beyond those included as *FL* in Table 2 may contribute explanations for  
331 *UL*: limits of color perception and or partial preferences, presence of secondary  
332 metabolites in fruit pulp and leaves, toxins and combinations of monosaccharides  
333 in nectar, etc. For example, aside from *FL*, some pairwise interactions may sim-  
334 ply have an asymptotically-zero probability of interspecific encounter between the  
335 partner species, if they are very rare. However, it is surprising that just the limited  
336 set of forbidden link types considered in Table 1 explain between 24.6–77.2% of  
337 the unobserved links. Notably, the Arima Valley, Santa Virgínia, and Hato Ratón  
338 networks have  $> 60\%$  of the unobserved links explained, which might be related  
339 to the fact that they are subnetworks (Arima Valley, Santa Virgínia) or relatively  
340 small networks (Hato Ratón). All this means that empirical networks may have  
341 sizable fractions of structural zeroes. Ignoring this biological fact may contribute  
342 to wrongly inferring undersampling of interactions in real-world assemblages.

343 To sum up, two elements of inference are required in the analysis of unobserved  
344 interactions in ecological interaction networks: first, detailed natural history infor-  
345 mation on the participant species that allows the inference of biological constraints  
346 imposing forbidden links, so that structural zeroes can be identified in the adja-  
347 cency matrix. Second, a critical analysis of sampling robustness and a robust  
348 estimate of the actual fraction of missing links,  $M$ , resulting in a robust estimate  
349 of  $I$ . In the next sections I explore these elements of inference, using *IACs* to  
350 assess the robustness of interaction sampling.

## 351 Asymptotic diversity estimates

352 Let's assume a sampling of the diversity in a specific locality, over relatively ho-  
353 mogeneous landscape where we aim at determining the number of species present  
354 for a particular group of organisms. To do that we carry out transects or plot  
355 samplings across the landscape or use any other type of direct or indirect record-  
356 ing method, adequately replicated so we obtain a number of samples. Briefly,  $S_{obs}$   
357 is the total number of species observed in a sample, or in a set of samples.  $S_{est}$   
358 is the estimated number of species in the community represented by the sample,  
359 or by the set of samples, where *est* indicates an estimator. With abundance data,  
360 let  $S_k$  be the number of species each represented by exactly  $k$  individuals in a sin-  
361 gle sample. Thus,  $S_0$  is the number of undetected species (species present in the  
362 community but not included in the sample),  $S_1$  is the number of singleton species  
363 (represented by just one individual),  $S_2$  is the number of doubleton species (species  
364 with two individuals), etc. The total number of individuals in the sample would be:  
365

$$n = \sum_{k=1}^{S_{obs}} S_k$$

366

367 A frequently used asymptotic, bias corrected, non-parametric estimator is  $S_{Chao1}$   
368 (Hortal, Borges & Gaspar, 2006; Chao, 2005; Colwell, 2013):

$$S_{Chao1} = S_{obs} + \frac{S_1(S_1 - 1)}{2(S_2 + 1)}$$

369 Another frequently used alternative is the Chao2 estimator,  $S_{Chao2}$  (Gotelli &

Jordano - Sampling networks

370 Colwell, 2001), which has been reported to have a limited bias for small sample  
371 sizes (Colwell & Coddington, 1994; Chao, 2005). Instead of using counts it uses  
372 incidence frequencies ( $Q_k$ ) among samples (number of species present in just one  
373 sample, in two samples, etc.):

$$S_{Chao2} = S_{obs} + \frac{Q_1(Q_1 - 1)}{2(Q_2 + 1)}$$

374 A plot of the cumulative number of species recorded,  $S_n$ , as a function of some  
375 measure of sampling effort (say,  $n$  samples taken) yields the species accumulation  
376 curve (SAC) or collector's curve (Colwell & Coddington, 1994). Similarly, inter-  
377 action accumulation curves (IAC), analogous to SACs, can be used to assess the  
378 robustness of interactions sampling for plant-animal community datasets (Jordano,  
379 1987; Jordano, Vázquez & Bascompte, 2009; Olesen *et al.*, 2011), as discussed in  
380 the next section.

## 381 **Assessing sampling effort when recording interac-** 382 **tions**

383 The basic method we can propose to estimate sampling effort and explicitly show  
384 the analogues with rarefaction analysis in biodiversity research is to vectorize the  
385 interaction matrix  $AP$  so that we get a vector of all the potential pairwise interac-  
386 tions ( $I_{max}$ , Table 1) that can occur in the observed assemblage with  $A_{obs}$  animal  
387 species and  $P_{obs}$  plant species. The new “species” we aim to sample are the pairwise  
388 interactions (Table 3). So, if we have in our community *Turdus merula* ( $Tm$ ) and  
389 *Rosa canina* ( $Rc$ ) and *Prunus mahaleb* ( $Pm$ ), our problem will be to sample 2 new

Jordano - Sampling networks

390 “species”:  $Tm - Rc$  and  $Tm - Pm$ . In general, if we have  $A = 1\dots i$ , animal species  
391 and  $P = 1\dots j$  plant species (assuming a complete list of species in the assemblage),  
392 we’ll have a vector of “new” species to sample:  $A_1P_1, A_1P_2, \dots, A_2P_1, A_2P_2, \dots, A_iP_j$ .  
393 We can represent the successive samples where we can potentially get records of  
394 these interactions in a matrix with the vectorized interaction matrix and columns  
395 representing the successive samples we take (Table 3). This is simply a vectorized  
396 version of the interaction matrix. This is analogous to a biodiversity sampling ma-  
397 trix with species as rows and sampling units (e.g., quadrats) as columns (Jordano,  
398 Vázquez & Bascompte, 2009). The package *EstimateS* (Colwell, 2013) includes  
399 a complete set of functions for estimating the mean IAC and its unconditional  
400 standard deviation from random permutations of the data, or subsampling with-  
401 out replacement (Gotelli & Colwell, 2001) and the asymptotic estimators for the  
402 expected number of distinct pairwise interactions included in a given reference  
403 sample of interaction records (see also the `specaccum` function in library `vegan` of  
404 the R Package)(R Development Core Team, 2010; Jordano, Vázquez & Bascompte,  
405 2009; Olesen *et al.*, 2011). In particular, we may take advantage of replicated in-  
406 cidence data, as it takes account of heterogeneity among samples (days, censuses,  
407 etc.; R.K Colwell, pers. comm.) (see also Colwell, Mao & Chang, 2004; Colwell,  
408 Dunn & Harris, 2012; Chao *et al.*, 2014).

409 In this way we effectively extend sampling theory developed for species diversity  
410 to the sampling of ecological interactions. Yet future theoretical work will be  
411 needed to formally assess the similarities and differences in the two approaches  
412 and developing biologically meaningful null models of expected interaction richness  
413 with added sampling effort.

414 Diversity-accumulation analysis (Magurran, 1988; Hortal, Borges & Gaspar,

2006) comes up immediately with this type of dataset. This procedure plots the accumulation curve for the expected number of distinct pairwise interactions recorded with increasing sampling effort (Jordano, Vázquez & Bascompte, 2009; Olesen *et al.*, 2011). Asymptotic estimates of interaction richness and its associated standard errors and confidence intervals can thus be obtained (Hortal, Borges & Gaspar, 2006) (see Supplementary Online Material). It should be noted that the asymptotic estimate of interaction richness explicitly ignores the fact that, due to forbidden links, a number of pairwise interactions among the  $I_{max}$  number specified in the adjacency matrix  $\Delta$  cannot be recorded, irrespective of sampling effort.

We may expect undersampling specially in moderate to large sized networks with multiple modules (i.e., species subsets requiring different sampling strategies) (Jordano, 1987; Olesen *et al.*, 2011; Chacoff *et al.*, 2012); adequate sampling may be feasible when interaction subwebs are studied (Olesen *et al.*, 2011; Vizentin-Bugoni, Maruyama & Sazima, 2014), typically with more homogeneous subsets of species (e.g., bumblebee-pollinated flowers). In any case the sparseness of the  $\Delta$  matrix is by no means an indication of undersampling whenever the issue of structural zeroes in the interaction matrices is effectively incorporated in the estimates.

For example, mixture models incorporating detectabilities have been proposed to effectively account for rare species (Mao & Colwell, 2005). In an analogous line, mixture models could be extended to samples of pairwise interactions, also with specific detectability values. These detection rate/odds could be variable among groups of interactions, depending on their specific detectability. For example, detectability of flower-pollinator interactions involving bumblebees could have a higher detectability than flower-pollinator pairwise interactions involving, say, ni-

440 tidulid beetles. These more homogeneous groupings of pairwise interactions within  
441 a network define modules (Bascompte & Jordano, 2014), so we might expect that  
442 interactions of a given module (e.g., plants and their hummingbird pollinators; Fig.  
443 1a) may share similar detectability values, in an analogous way to species groups  
444 receiving homogeneous detectability values in mixture models (Mao & Colwell,  
445 2005). In its simplest form, this would result in a sample with multiple pairwise  
446 interactions detected, in which the number of interaction events recorded for each  
447 distinct interaction found in the sample is recorded (i.e., a column vector in Table  
448 3, corresponding to, say, a sampling day). The number of interactions recorded for  
449 the  $i_{th}$  pairwise interaction (i.e.,  $A_i P_j$  in Table 3),  $Y_i$  could be treated as a Poisson  
450 random variable with a mean parameter  $\lambda_i$ , its detection rate. Mixture models  
451 (Mao & Colwell, 2005) include estimates for abundance-based data (their analogs  
452 in interaction sampling would be weighted data), where  $Y_i$  is a Poisson random  
453 variable with detection rate  $\lambda_i$ . This is combined with the incidence-based model,  
454 where  $Y_i$  is a binomial random variable (their analogous in interaction sampling  
455 would be presence/absence records of interactions) with detection odds  $\lambda_i$ . Let  
456  $T$  be the number of samples in an incidence-based data set. A Poisson/binomial  
457 density can be written as (Mao & Colwell, 2005):

$$g(y; \lambda) = \begin{cases} \frac{\lambda^y}{y!e^\lambda} & [1] \\ \binom{T}{y} \frac{\lambda^y}{(1+\lambda)^T} & [2] \end{cases}$$

458 where [1] corresponds to a weighted network, and [2] to a qualitative network.

459 The detection rates  $\lambda_i$  depend on the relative abundances  $\phi_i$  of the interactions,  
460 the probability of a pairwise interaction being detected when it is present, and the

461 sample size (the number of interactions recorded), which, in turn, is a function  
462 of the sampling effort. Unfortunately, no specific sampling model has been de-  
463 veloped along these lines for species interactions and their characteristic features.  
464 For example, a complication factor might be that interaction abundances,  $\phi_i$ , in  
465 real assemblages are a function of the abundances of interacting species that de-  
466 termine interspecific encounter rates; yet they also depend on biological factors  
467 that ultimately determine if the interaction occurs when the partner species are  
468 present. For example,  $\lambda_i$  should be set to zero for all  $FL$ . In its simplest form,  $\phi_i$   
469 could be estimated from just the product of partner species abundances, an ap-  
470 proach recently used as a null model to assess the role of biological constraints in  
471 generating forbidden links and explaining interaction patterns (Vizentin-Bugoni,  
472 Maruyama & Sazima, 2014). Yet more complex models (e.g., Wells & O'hara  
473 2012) should incorporate not only interspecific encounter probabilities, but also  
474 interaction detectabilities, phenotypic matching and incidence of forbidden links.  
475 Mixture models are certainly complex and for most situations of evaluating sam-  
476 pling effort better alternatives include the simpler incidence-based rarefaction and  
477 extrapolation (Colwell, Dunn & Harris, 2012; Chao *et al.*, 2014).

## 478 **The *real* missing links**

479 Given that a fraction of unobserved interactions can be accounted for by for-  
480 bidden links, what about the remaining missing interactions? We have already  
481 discussed that some of these could still be related to unaccounted constraints, and  
482 still others would be certainly attributable to insufficient sampling. Would this  
483 always be the case? Multispecific assemblages of distinct taxonomic relatedness,

Jordano - Sampling networks

484 whose interactions can be represented as bipartite networks (e.g., host-parasite,  
485 plant-animal mutualisms, plant-herbivore interactions- with two distinct sets of  
486 unrelated higher taxa), are shaped by interspecific encounters among individuals  
487 of the partner species (Fig. 2). A crucial ecological aspect limiting these inter-  
488 actions is the probability of interspecific encounter, i.e., the probability that two  
489 individuals of the partner species actually encounter each other in nature.

490 Given log-normally distributed abundances of the two species groups, the ex-  
491 pected probabilities of interspecific encounter ( $PIE$ ) would be simply the product  
492 of the two lognormal distributions. Thus, we might expect that for low  $PIE$  val-  
493 ues, pairwise interactions would be either extremely difficult to sample, or just  
494 simply not occurring in nature. Consider the Nava de las Correhuelas interaction  
495 web (NCH, Table 2), with  $A = 36$ ,  $P = 25$ ,  $I = 181$ , and almost half of the unob-  
496 served interactions not accounted for by forbidden links, thus  $M = 53.1\%$ . Given  
497 the robust sampling of this network (Jordano, Vázquez & Bascompte, 2009), a  
498 sizable fraction of these possible but missing links would be simply not occurring  
499 in nature, most likely by extremely low  $PIE$ , in fact asymptotically zero. Given  
500 the vectorized list of pairwise interactions for NCH, I computed the  $PIE$  values for  
501 each one by multiplying element-wise the two species abundance distributions. The  
502  $PIE_{max} = 0.0597$ , being a neutral estimate, based on the assumption that interac-  
503 tions occur in proportion to the species-specific local abundances. With  $PIE_{median}$   
504  $< 1.4 \cdot 10^{-4}$  we may safely expect (note the quantile estimate  $Q_{75\%} = 3.27 \cdot 10^{-4}$ )  
505 that a sizable fraction of these missing interactions may not occur according to  
506 this neutral expectation (Jordano, 1987; Olesen *et al.*, 2011) (neutral forbidden  
507 links, *sensu* Canard *et al.*, 2012).

508 When we consider the vectorized interaction matrix, enumerating all pairwise



509 interactions for the  $AP$  combinations, the expected probabilities of finding a given  
510 interaction can be estimated with a Good-Turing approximation (Good, 1953).  
511 The technique, developed by Alan Turing and I.J. Good with applications to lin-  
512 guistics and word analysis (Gale & Sampson, 1995) has been recently extended in  
513 novel ways for ecological analyses (Chao *et al.*, 2015). It estimates the probability  
514 of recording an interaction of a hitherto unseen pair of partners, given a set of past  
515 records of interactions between other species pairs. Let a sample of  $N$  interactions  
516 so that  $n_r$  distinct pairwise interactions have exactly  $r$  records. All Good-Turing  
517 estimators obtain the underlying frequencies of events as:

$$P(X) = \frac{(N_X + 1)}{T} \left(1 - \frac{E(1)}{T}\right) \quad (1)$$

518 where  $X$  is the pairwise interaction,  $N_X$  is the number of times interaction  $X$   
519 is recorded,  $T$  is the sample size (number of distinct interactions recorded) and  
520  $E(1)$  is an estimate of how many different interactions were recorded exactly once.  
521 Strictly speaking Equation (1) gives the probability that the next interaction type  
522 recorded will be  $X$ , after sampling a given assemblage of interacting species. In  
523 other words, we scale down the maximum-likelihood estimator  $\frac{n}{T}$  by a factor of  
524  $\frac{1-E(1)}{T}$ . This reduces all the probabilities for interactions we have recorded, and  
525 makes room for interactions we haven't seen. If we sum over the interactions we  
526 have seen, then the sum of  $P(X)$  is  $1 - \frac{1-E(1)}{T}$ . Because probabilities sum to one,  
527 we have the left-over probability of  $P_{new} = \frac{E(1)}{T}$  of seeing something new, where  
528 new means that we sample a new pairwise interaction. Note, however, that Good-  
529 Turing estimators, the traditional asymptotic estimators, do not account in our  
530 case for the forbidden interactions.

## 531 Discussion

532 Recent work has inferred that most data available for interaction networks are  
533 incomplete due to undersampling, resulting in a variety of biased parameters and  
534 network patterns (Chacoff *et al.*, 2012). It is important to note, however, that  
535 in practice, many surveyed networks to date have been subnets of much larger  
536 networks. This is also true for protein interaction, gene regulation, and metabolic  
537 networks, where only a subset of the molecular entities in a cell have been sam-  
538 pled (Stumpf, Wiuf & May, 2005). Despite recent attempts to document whole  
539 ecosystem meta-networks (Pocock, Evans & Memmott, 2012), it is likely that most  
540 ecological interaction networks will illustrate just major ecosystem compartments.  
541 Due to their high generalization, high temporal and spatial turnover, and high  
542 complexity of association patterns, adequate sampling of ecological interaction  
543 networks is challenging and requires extremely large sampling effort. Undersam-  
544 pling of ecological networks may originate from the analysis of assemblage subsets  
545 (e.g., taxonomically or functionally defined), and/or from logistically-limited sam-  
546 pling effort. It is extremely hard to robustly sample the set of biotic interactions  
547 even for relatively simple, species-poor assemblages; thus, we need to assess how  
548 robust is the characterization of the adjacency matrix  $\Delta$ . Concluding that an  
549 ecological network dataset is undersampled just by its sparseness would be unreal-  
550 istic. The reason stems from a biological fact: a sizeable fraction of the maximum,  
551 potential links that can be recorded among two distinct sets of species is simply un-  
552 observable, irrespective of sampling effort (Jordano, 1987). In addition, sampling  
553 effort needs to be explicitly gauged because of its potential influence on parameter  
554 estimates for the network.

555 Missing links are a characteristic feature of all plant-animal interaction net-  
556 works, and likely pervade other ecological interactions. Important natural history  
557 details explain a fraction of them, resulting in unrealizable interactions (i.e., for-  
558 bidden interactions) that define structural zeroes in the interaction matrices and  
559 contribute to their extreme sparseness. Sampling interactions is a way to monitor  
560 biodiversity beyond the simple enumeration of component species and to develop  
561 efficient and robust inventories of functional interactions. Yet no sampling theory  
562 for interactions is available. Some key components of this sampling are analo-  
563 gous to species sampling and traditional biodiversity inventories; however, there  
564 are important differences. Focusing just on the realized interactions or treating  
565 missing interactions as the expected unique result of sampling bias would miss  
566 important components to understand how mutualisms coevolve within complex  
567 webs of interdependence among species.

568 Contrary to species inventories, a sizable fraction of non-observed pairwise  
569 interactions cannot be sampled, due to biological constraints that forbid their  
570 occurrence. Moreover, recent implementations of inference methods for unobserved  
571 species (Chao *et al.*, 2015) or for individual-based data (Wells & O'Hara, 2012)  
572 can be combined with the forbidden link approach. They do not account either  
573 for the existence of these ecological constraints, but can help in estimating their  
574 relative importance, simply by the difference between the asymptotic estimate of  
575 interaction richness *in a robustly-sampled* assemblage and the maximum richness  
576  $I_{max}$  of interactions.

577 Ecological interactions provide the wireframe supporting the lives of species,  
578 and they also embed crucial ecosystem functions which are fundamental for sup-  
579 porting the Earth system. We still have a limited knowledge of the biodiversity

Jordano - Sampling networks

580 of ecological interactions, and they are being lost (extinct) at a very fast pace,  
581 frequently preceding species extinctions (Valiente-Banuet *et al.*, 2014). We ur-  
582 gently need robust techniques to assess the completeness of ecological interactions  
583 networks because this knowledge will allow the identification of the minimal com-  
584 ponents of their ecological complexity that need to be restored to rebuild functional  
585 ecosystems after perturbations.

## 586 Acknowledgements

587 I am indebted to Jens M. Olesen, Alfredo Valido, Jordi Bascompte, Thomas  
588 Lewinshon, John N. Thompson, Nick Gotelli, Carsten Dormann, and Paulo R.  
589 Guimaraães Jr. for useful and thoughtful discussion at different stages of this  
590 manuscript. Jeferson Vizentin-Bugoni kindly helped with the Sta Virgínia data.  
591 Jens M. Olesen kindly made available the Grundvad dataset; together with Robert  
592 K. Colwell, Néstor Pérez-Méndez, JuanPe González-Varo, and Paco Rodríguez pro-  
593 vided most useful comments to a final version of the ms. Robert Colwell shared  
594 a number of crucial suggestions that clarified my vision of sampling ecological in-  
595 teractions. The study was supported by a Junta de Andalucía Excellence Grant  
596 (RNM-5731), as well as a Severo Ochoa Excellence Award from the Ministerio de  
597 Economía y Competitividad (SEV-2012-0262). The Agencia de Medio Ambiente,  
598 Junta de Andalucía, provided generous facilities that made possible my long-term  
599 field work in different natural parks.

## 600 Data accessibility

601 This review does not use new raw data, but includes some re-analyses of previously  
602 published material. All the original data supporting the paper, R code, supple-  
603 mentary figures, and summaries of analytical protocols is available at the author's  
604 GitHub repository ([https://github.com/pedroj/MS\\_Network-Sampling](https://github.com/pedroj/MS_Network-Sampling)), with  
605 DOI: 10.5281/zenodo.29437.

## 606 References

- 607 Banasek-Richter, C., Cattin, M. & Bersier, L. (2004) Sampling effects and the ro-  
608 bustness of quantitative and qualitative food-web descriptors. *Journal of Theo-*  
609 *retical Biology*, **226**, 23–32.
- 610 Bascompte, J. & Jordano, P. (2014) *Mutualistic networks*. Monographs in Popu-  
611 lation Biology, No. 53. Princeton University Press, Princeton, NJ.
- 612 Bersier, L., Banasek-Richter, C. & Cattin, M. (2002) Quantitative descriptors of  
613 food-web matrices. *Ecology*, **83**, 2394–2407.
- 614 Blüthgen, N. (2010) Why network analysis is often disconnected from community  
615 ecology: A critique and an ecologist's guide. *Basic And Applied Ecology*, **11**,  
616 185–195.
- 617 Bosch, J., Martín González, A.M., Rodrigo, A. & Navarro, D. (2009) Plant-  
618 pollinator networks: adding the pollinator's perspective. *Ecology Letters*, **12**,  
619 409–419.

- 620 Brose, U., Martinez, N. & Williams, R. (2003) Estimating species richness: Sen-  
621 sitivity to sample coverage and insensitivity to spatial patterns. *Ecology*, **84**,  
622 2364–2377.
- 623 Bunge, J. & Fitzpatrick, M. (1993) Estimating the number of species: a review.  
624 *Journal of the American Statistical Association*, **88**, 364–373.
- 625 Canard, E., Mouquet, N., Marescot, L., Gaston, K.J., Gravel, D. & Mouillot,  
626 D. (2012) Emergence of structural patterns in neutral trophic networks. *PLoS*  
627 *ONE*, **7**, e38295.
- 628 Chacoff, N.P., Vazquez, D.P., Lomascolo, S.B., Stevani, E.L., Dorado, J. & Padrón,  
629 B. (2012) Evaluating sampling completeness in a desert plant-pollinator network.  
630 *Journal of Animal Ecology*, **81**, 190–200.
- 631 Chao, A. (2005) Species richness estimation. *Encyclopedia of Statistical Sciences*,  
632 pp. 7909–7916. Oxford University Press, New York, USA.
- 633 Chao, A., Gotelli, N.J., Hsieh, T.C., Sander, E.L., Ma, K.H., Colwell, R.K. & Elli-  
634 son, A.M. (2014) Rarefaction and extrapolation with Hill numbers: a framework  
635 for sampling and estimation in species diversity studies. *Ecological Monographs*,  
636 **84**, 45–67.
- 637 Chao, A., Hsieh, T.C., Chazdon, R.L., Colwell, R.K. & Gotelli, N.J. (2015) Un-  
638 veiling the species-rank abundance distribution by generalizing the Good-Turing  
639 sample coverage theory. *Ecology*, **96**, 1189–1201.
- 640 Coddington, J.A., Agnarsson, I., Miller, J.A., Kuntner, M. & Hormiga, G. (2009)

Jordano - Sampling networks

- 641 Undersampling bias: the null hypothesis for singleton species in tropical arthro-  
642 pod surveys. *Journal of Animal Ecology*, **78**, 573–584.
- 643 Cohen, J.E. (1978) *Food webs and niche space*. Princeton University Press, Prince-  
644 ton, New Jersey, US.
- 645 Cohen, J.E., Beaver, R.A., Cousins, S.H., DeAngelis, D.L., Goldwasser, L., Heong,  
646 K.L., Holt, R.D., Kohn, A.J., Lawton, J.H., Martinez, N., O'Malley, R., Page,  
647 L.M., Patten, B.C., Pimm, S.L., Polis, G., Rejmanek, M., Schoener, T.W.,  
648 Schenly, K., Sprules, W.G., Teal, J.M., Ulanowicz, R., Warren, P.H., Wilbur,  
649 H.M. & Yodis, P. (1993) Improving food webs. *Ecology*, **74**, 252–258.
- 650 Colwell, R. & Coddington, J. (1994) Estimating terrestrial biodiversity through ex-  
651 trapolation. *Philosophical Transactions Of The Royal Society Of London Series*  
652 *B-Biological Sciences*, **345**, 101–118.
- 653 Colwell, R.K. (2009) Biodiversity: concepts, patterns, and measurement. *The*  
654 *Princeton Guide to Ecology* (ed. S.A. Levin), pp. 257–263. Princeton University  
655 Press, Princeton.
- 656 Colwell, R.K. (2013) EstimateS: Biodiversity Estimation. -, pp. 1–33.
- 657 Colwell, R.K., Dunn, R.R. & Harris, N.C. (2012) Coextinction and persistence of  
658 dependent species in a changing world. *Annual Review of Ecology Evolution and*  
659 *Systematics*, **43**, 183–203.
- 660 Colwell, R.K., Mao, C.X. & Chang, J. (2004) Interpolating, extrapolating, and  
661 comparing incidence-based species accumulation curves. *Ecology*, **85**, 2717–2727.

- 662 Dorado, J., Vazquez, D.P., Stevani, E.L. & Chacoff, N.P. (2011) Rareness and  
663 specialization in plant-pollinator networks. *Ecology*, **92**, 19–25.
- 664 Dormann, C.F., Frund, J., Bluthgen, N. & Gruber, B. (2009) Indices, graphs and  
665 null models: Analyzing bipartite ecological networks. *Open Ecology Journal*, **2**,  
666 7–24.
- 667 Dupont, Y.L., Trøjelsgaard, K. & Olesen, J.M. (2011) Scaling down from species  
668 to individuals: a flower–visitation network between individual honeybees and  
669 thistle plants. *Oikos*, **120**, 170–177.
- 670 Dupont, Y.L., Trøjelsgaard, K., Hagen, M., Henriksen, M.V., Olesen, J.M., Ped-  
671 ersen, N.M.E. & Kissling, W.D. (2014) Spatial structure of an individual-based  
672 plant-pollinator network. *Oikos*, **123**, 1301–1310.
- 673 Eklöf, A., Jacob, U., Kopp, J., Bosch, J., Castro-Urgal, R., Chacoff, N.P.,  
674 Dalsgaard, B., de Sassi, C., Galetti, M., Guimaraes, P.R., Lomáscolo, S.B.,  
675 Martín González, A.M., Pizo, M.A., Rader, R., Rodrigo, A., Tylianakis, J.M.,  
676 Vazquez, D.P. & Allesina, S. (2013) The dimensionality of ecological networks.  
677 *Ecology Letters*, **16**, 577–583.
- 678 Elberling, H. & Olesen, J.M. (1999) The structure of a high latitude plant-flower  
679 visitor system: the dominance of flies. *Ecography*, **22**, 314–323.
- 680 Frund, J., McCann, K.S. & Williams, N.M. (2015) Sampling bias is a challenge  
681 for quantifying specialization and network structure: lessons from a quantitative  
682 niche model. *Oikos*, pp. n/a–n/a.



- 683 Gale, W.A. & Sampson, G. (1995) Good-Turing frequency estimation without  
684 tears. *Journal of Quantitative Linguistics*, **2**, 217–237.
- 685 Gibson, R.H., Knott, B., Eberlein, T. & Memmott, J. (2011) Sampling method  
686 influences the structure of plant–pollinator networks. *Oikos*, **120**, 822–831.
- 687 González-Varo, J.P., Arroyo, J.M. & Jordano, P. (2014) Who dispersed the seeds?  
688 The use of DNA barcoding in frugivory and seed dispersal studies. *Methods in*  
689 *Ecology and Evolution*, **5**, 806–814.
- 690 Good, I.J. (1953) The population frequencies of species and the estimation of  
691 population parameters. *Biometrika*, **40**, 237–264.
- 692 Gotelli, N.J. & Colwell, R.K. (2011) Estimating species richness. *Biological Di-*  
693 *versity Frontiers in Measurement and Assessment* (eds. A.E. Magurran & B.J.  
694 McGill), pp. 39–54. Oxford University Press, Oxford, UK.
- 695 Gotelli, N. & Colwell, R. (2001) Quantifying biodiversity: procedures and pitfalls  
696 in the measurement and comparison of species richness. *Ecology Letters*, **4**,  
697 379–391.
- 698 Hortal, J., Borges, P. & Gaspar, C. (2006) Evaluating the performance of species  
699 richness estimators: sensitivity to sample grain size. *Journal of Animal Ecology*,  
700 **75**, 274–287.
- 701 Ibanez, S. (2012) Optimizing size thresholds in a plant–pollinator interaction web:  
702 towards a mechanistic understanding of ecological networks. *Oecologia*, **170**,  
703 233–242.

- 704 Jordano, P. (1987) Patterns of mutualistic interactions in pollination and seed dis-  
705 persal: connectance, dependence asymmetries, and coevolution. *The American*  
706 *Naturalist*, **129**, 657–677.
- 707 Jordano, P., Bascompte, J. & Olesen, J. (2003) Invariant properties in coevolu-  
708 tionary networks of plant-animal interactions. *Ecology Letters*, **6**, 69–81.
- 709 Jordano, P., Vázquez, D. & Bascompte, J. (2009) Redes complejas de interac-  
710 ciones planta—animal. *Ecología y evolución de interacciones planta-animal* (eds.  
711 R. Medel, R. Dirzo & R. Zamora), pp. 17–41. Editorial Universitaria, Santiago,  
712 Chile.
- 713 Jurado-Rivera, J.A., Vogler, A.P., Reid, C.A.M., Petitpierre, E. & Gomez-Zurita,  
714 J. (2009) DNA barcoding insect-host plant associations. *Proceedings Of The*  
715 *Royal Society B-Biological Sciences*, **276**, 639–648.
- 716 Magurran, A. (1988) *Ecological diversity and its measurement*. Princeton Univer-  
717 sity Press, Princeton, US.
- 718 Mao, C. & Colwell, R.K. (2005) Estimation of species richness: mixture models,  
719 the role of rare species, and inferential challenges. *Ecology*, **86**, 1143–1153.
- 720 Martinez, N.D. (1993) Effects of resolution on food web structure. *Oikos*, **66**,  
721 403–412.
- 722 Martinez, N. (1991) Artifacts or attributes? Effects of resolution on food-web  
723 patterns in Little Rock Lake food web. *Ecological Monographs*, **61**, 367–392.
- 724 Maruyama, P.K., Vizentin-Bugoni, J., Oliveira, G.M., Oliveira, P.E. & Dalsgaard,

- 725 B. (2014) Morphological and spatio-temporal mismatches shape a neotropical  
726 savanna plant-hummingbird network. *Biotropica*, **46**, 740–747.
- 727 Moré, M., Amorim, F.W., Benitez-Vieyra, S., Medina, A.M., Sazima, M. &  
728 Cocucci, A.A. (2012) Armament Imbalances: Match and Mismatch in Plant-  
729 Pollinator Traits of Highly Specialized Long-Spurred Orchids. *PLoS ONE*, **7**,  
730 e41878.
- 731 Morris, R.J., Gripenberg, S., Lewis, O.T. & Roslin, T. (2013) Antagonistic inter-  
732 action networks are structured independently of latitude and host guild. *Ecology*  
733 *Letters*, **17**, 340–349.
- 734 Nielsen, A. & Bascompte, J. (2007) Ecological networks, nestedness and sampling  
735 effort. *Journal of Ecology*, **95**, 1134–1141–1141.
- 736 Olesen, J.M., Bascompte, J., Dupont, Y.L., Elberling, H. & Jordano, P. (2011)  
737 Missing and forbidden links in mutualistic networks. *Proceedings Of The Royal*  
738 *Society B-Biological Sciences*, **278**, 725–732.
- 739 Olesen, J.M., Dupont, Y.L., O’gorman, E., Ings, T.C., Layer, K., Melin, C.J.,  
740 Trjelsgaard, K., Pichler, D.E., Rasmussen, C. & Woodward, G. (2010) From  
741 Broadstone to Zackenberg. *Advances in Ecological Research*, **42**, 1–69.
- 742 Olesen, J. & Jordano, P. (2002) Geographic patterns in plant-pollinator mutualistic  
743 networks. *Ecology*, **83**, 2416–2424.
- 744 Olito, C. & Fox, J.W. (2014) Species traits and abundances predict metrics of  
745 plant-pollinator network structure, but not pairwise interactions. *Oikos*, **124**,  
746 428–436.

- 747 Ollerton, J. & Cranmer, L. (2002) Latitudinal trends in plant-pollinator interac-  
748 tions: are tropical plants more specialised? *Oikos*, **98**, 340–350.
- 749 Pereira, H.M., Ferrier, S., Walters, M., Geller, G.N., Jongman, R.H.G., Scholes,  
750 R.J., Bruford, M.W., Brummitt, N., Butchart, S.H.M., Cardoso, A.C., Coops,  
751 N., Dulloo, E., Faith, D., Freyhof, J., Gregory, R.D., Heip, C., Hoft, R., Hurtt,  
752 G., Jetz, W., Karp, D.S., Mcgeoch, M., Obura, D., Onoda, Y., Pettorelli, N.,  
753 Reyers, B., Sayre, R., Scharlemann, J.P.W., Stuart, S., Turak, E., Walpole, M.  
754 & Wegmann, M. (2013) Essential biodiversity variables. *Science*, **339**, 277–278.
- 755 Pocock, M.J.O., Evans, D.M. & Memmott, J. (2012) The Robustness and Restora-  
756 tion of a Network of Ecological Networks. *Science*, **335**, 973–977.
- 757 Preston, F. (1948) The commonness, and rarity, of species. *Ecology*, **29**, 254–283.
- 758 R Development Core Team (2010) *R: A language and environment for statis-*  
759 *tical computing*. R Foundation for Statistical Computing. Vienna, Austria.  
760 <http://www.R-project.org>, Vienna, Austria.
- 761 Rivera-Hutinel, A., Bustamante, R.O., Marín, V.H. & Medel, R. (2012) Effects of  
762 sampling completeness on the structure of plant-pollinator networks. *Ecology*,  
763 **93**, 1593–1603.
- 764 Schleuning, M., Frund, J., Klein, A.M., Abrahamczyk, S., Alarcón, R., Albrecht,  
765 M., Andersson, G.K.S., Bazarian, S., Böhning-Gaese, K., Bommarco, R., Dals-  
766 gaard, B., Dehling, D.M., Gotlieb, A., Hagen, M., Hickler, T., Holzschuh, A.,  
767 Kaiser-Bunbury, C.N., Kreft, H., Morris, R.J., Sandel, B., Sutherland, W.J.,  
768 Svenning, J.C., Tscharrntke, T., Watts, S., Weiner, C.N., Werner, M., Williams,

Jordano - Sampling networks

- 769 N.M., Winqvist, C., Dormann, C.F. & Blüthgen, N. (2012) Specialization of  
770 mutualistic interaction networks decreases toward tropical latitudes. *Current*  
771 *Biology*, **22**, 1925–1931.
- 772 Snow, B. & Snow, D. (1972) Feeding niches of hummingbirds in a Trinidad valley.  
773 *Journal of Animal Ecology*, **41**, 471–485.
- 774 Snow, B. & Snow, D. (1988) *Birds and berries*. Poyser, Calton, UK.
- 775 Stang, M., Klinkhamer, P., Waser, N.M., Stang, I. & van der Meijden, E. (2009)  
776 Size-specific interaction patterns and size matching in a plant-pollinator inter-  
777 action web. *Annals Of Botany*, **103**, 1459–1469.
- 778 Strogatz, S. (2001) Exploring complex networks. *Nature*, **410**, 268–276.
- 779 Stumpf, M.P.H., Wiuf, C. & May, R.M. (2005) Subnets of scale-free networks are  
780 not scale-free: Sampling properties of networks. *Proceedings of the National*  
781 *Academy of Sciences USA*, **102**, 4221–4224.
- 782 Thébault, E. & Fontaine, C. (2010) Stability of ecological communities and the  
783 architecture of mutualistic and trophic networks. *Science*, **329**, 853–856.
- 784 Valiente-Banuet, A., Aizen, M.A., Alcántara, J.M., Arroyo, J., Cocucci, A.,  
785 Galetti, M., García, M.B., García, D., Gomez, J.M., Jordano, P., Medel, R.,  
786 Navarro, L., Obeso, J.R., Oviedo, R., Ramírez, N., Rey, P.J., Traveset, A.,  
787 Verdú, M. & Zamora, R. (2014) Beyond species loss: the extinction of ecological  
788 interactions in a changing world. *Functional Ecology*, **29**, 299–307.
- 789 Vázquez, D.P., Chacoff, N.P. & Cagnolo, L. (2009) Evaluating multiple deter-

Jordano - Sampling networks

790 minants of the structure of plant-animal mutualistic networks. *Ecology*, **90**,  
791 2039–2046.

792 Vazquez, D.P., Ramos-Jiliberto, R., Urbani, P. & Valdovinos, F.S. (2015) A con-  
793 ceptual framework for studying the strength of plant-animal mutualistic inter-  
794 actions. *Ecology Letters*, **18**, 385–400.

795 Vazquez, D., Morris, W. & Jordano, P. (2005) Interaction frequency as a surrogate  
796 for the total effect of animal mutualists on plants. *Ecology Letters*, **8**, 1088–1094.

797 Vizentin-Bugoni, J., Maruyama, P.K. & Sazima, M. (2014) Processes entangling  
798 interactions in communities: forbidden links are more important than abundance  
799 in a hummingbird-plant network. *Proceedings Of The Royal Society B-Biological*  
800 *Sciences*, **281**, 20132397–20132397.

801 Wells, K. & O'Hara, R.B. (2012) Species interactions: estimating per-individual  
802 interaction strength and covariates before simplifying data into per-species eco-  
803 logical networks. *Methods in Ecology and Evolution*, **4**, 1–8.

804 Wirta, H.K., Hebert, P.D.N., Kaartinen, R., Prosser, S.W., Várkonyi, G. & Roslin,  
805 T. (2014) Complementary molecular information changes our perception of food  
806 web structure. *Proceedings of the National Academy of Sciences USA*, **111**,  
807 1885–1890.

## 808 Figure captions

809 **Figure 1.** Sampling ecological interaction networks (e.g., plant-animal interac-  
810 tions) usually focus on different types of subsampling the full network, yielding  
811 submatrices  $\Delta[m, n]$  of the full interaction matrix  $\Delta$  with  $A$  and  $P$  animal and  
812 plant species. a) all the potential plants interacting with a subset of the animals  
813 (e.g., studying just the hummingbird-pollinated flower species in a community);  
814 b) all the potential animal species interacting with a subset of the plant species  
815 (e.g., studying the frugivore species feeding on figs *Ficus* in a community); and c)  
816 sampling a subset of all the potential animal species interacting with a subset of all  
817 the plant species (e.g., studying the plant-frugivore interactions of the rainforest  
818 understory).

819

820 **Figure 2.** Sampling species interactions in natural communities. Suppose an  
821 assemblage with  $A = 3$  animal species (red, species 1–3 with three, two, and 1  
822 individuals, respectively) and  $P = 3$  plant species (green, species a-c with three  
823 individuals each) (colored balls), sampled with increasing effort in steps 1 to 6  
824 (panels). In Step 1 we record animal species 1 and plant species 1 and 2 with  
825 a total of three interactions (black lines) represented as two distinct interactions:  
826  $1 - a$  and  $1 - b$ . As we advance our sampling (panels 1 to 6, illustrating e.g.,  
827 additional sampling days) we record new distinct interactions. Note that we actu-  
828 ally sample and record interactions among individuals, yet we pool the data across  
829 species to get a species by species interaction matrix. Few network analyses have  
830 been carried out on individual data(Dupont *et al.*, 2014).

831

832 **Figures**

Figure 1:

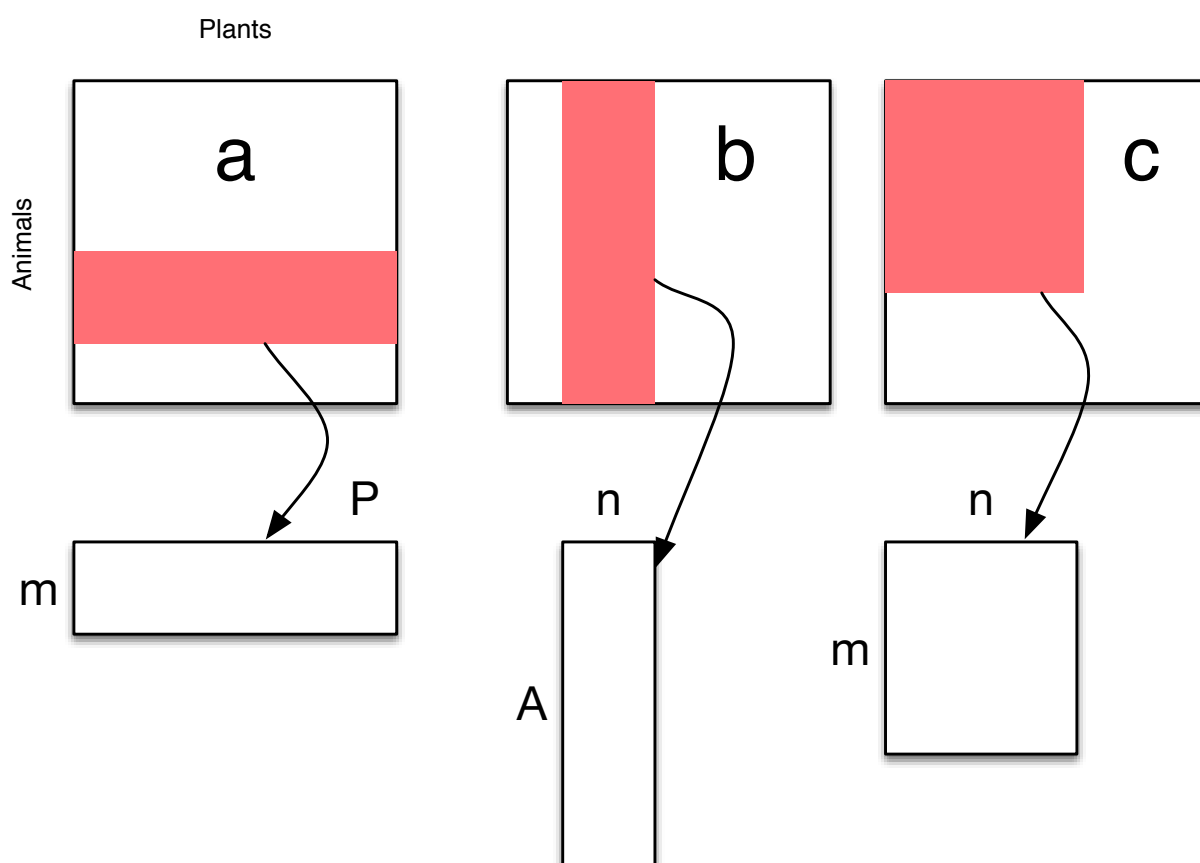



Jordano - Sampling networks

Figure 2:

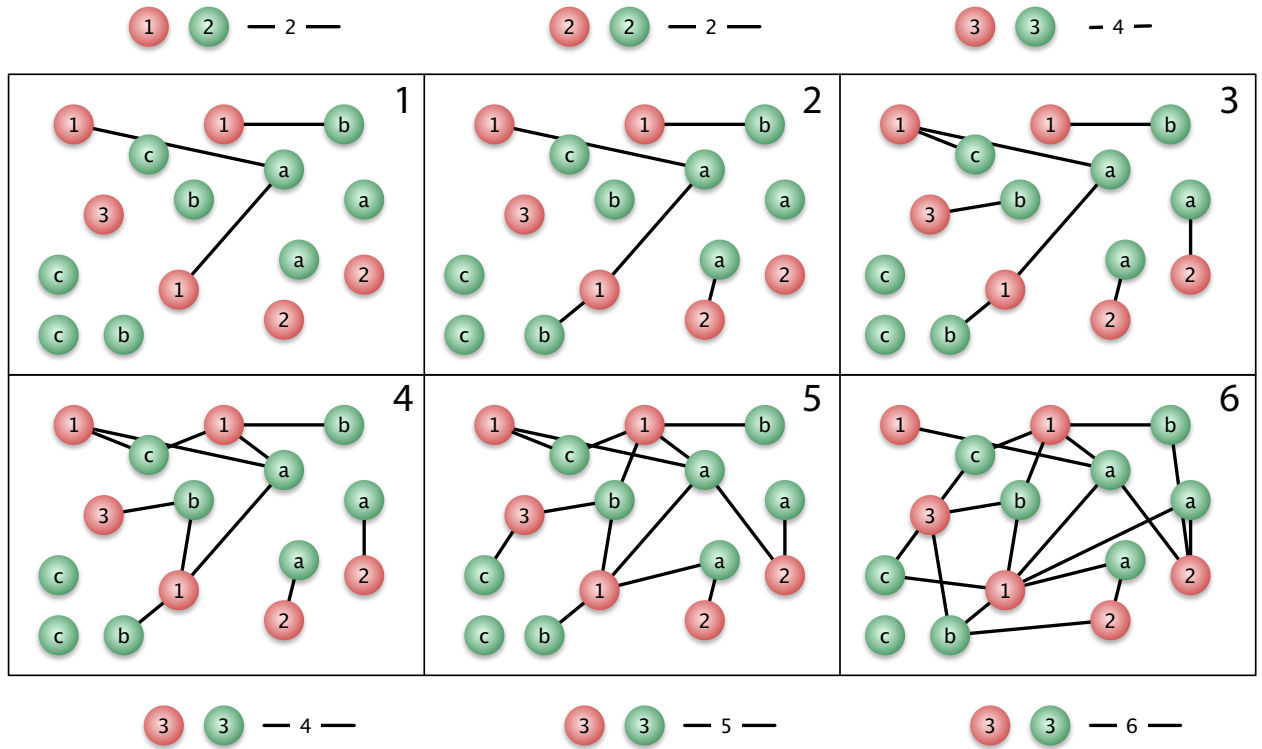

Jordano - Figure 1

## 833 Table captions

834 **Table 1.** A taxonomy of link types for ecological interactions (Olesen *et al.* 2011).  
835  $A$ , number of animal species;  $P$ , number of plant species;  $I$ , number of observed  
836 links;  $C = 100I/(AP)$ , connectance;  $FL$ , number of forbidden links; and  $ML$ ,  
837 number of missing links. As natural scientists, our ultimate goal is to eliminate  
838  $ML$  from the equation  $FL = AP - I - ML$ , which probably is not feasible given  
839 logistic sampling limitations. When we, during our study, estimate  $ML$  to be  
840 negligible, we cease observing and estimate  $I$  and  $FL$ .

841

842 **Table 2.** Frequencies of different type of forbidden links in natural plant-animal  
843 interaction assemblages.  $AP$ , maximum potential links,  $I_{max}$ ;  $I$ , number of ob-  
844 served links;  $UL$ , number of unobserved links;  $FL$ , number of forbidden links;  
845  $FL_P$ , phenology;  $FL_S$ , size restrictions;  $FL_A$ , accessibility;  $FL_O$ , other types of  
846 restrictions;  $ML$ , unknown causes (missing links). Relative frequencies (in paren-  
847 theses) calculated over  $I_{max} = AP$  for  $I$ ,  $ML$ , and  $FL$ ; for all forbidden links types,  
848 calculated over  $FL$ . References, from left to right: Olesen *et al.* 2008; Olesen &  
849 Myrthue unpubl.; Snow & Snow 1972 and Jordano *et al.* 2006; Vizentin-Bugoni  
850 *et al.* 2014; Jordano *et al.* 2009; Olesen *et al.* 2011.

851

852 **Table 3.** A vectorized interaction matrix.

853

854 **Table 4.** Sampling statistics for three plant-animal interaction networks (Olesen  
855 *et al.* 2011). Symbols as in Table 1;  $N$ , number of records;  $Chao1$  and  $ACE$  are  
856 asymptotic estimators for the number of distinct pairwise interactions  $I$  (Hortal

Jordano - Sampling networks

857 *et al.* 2006), and their standard errors;  $C$ , sample coverage for rare interactions  
858 (Chao & Jost 2012). Scaled asymptotic estimators and their confidence intervals  
859 ( $CI$ ) were calculated by weighting  $Chao1$  and  $ACE$  with the observed frequencies  
860 of forbidden links.

861

## 862 Tables

Table 1:

| Link type              | Formulation                           | Definition                                                                                                                                                                                                                                                                         |
|------------------------|---------------------------------------|------------------------------------------------------------------------------------------------------------------------------------------------------------------------------------------------------------------------------------------------------------------------------------|
| Potential links        | $I_{max} = A_{obs}P_{obs}$            | Size of observed network matrix, i.e. maximum number of potentially observable interactions; $A_{obs}$ and $P_{obs}$ , numbers of interacting animal and plant species, respectively. These might be below the real numbers of animal and plant species, $A_{est}$ and $P_{est}$ . |
| Observed links         | $I_{obs}$                             | Total number of observed links in the network given a sufficient sampling effort. Number of ones in the adjacency matrix.                                                                                                                                                          |
| True links             | $I_{est}$                             | Total number of links in the network given a sufficient sampling effort; expected for the augmented $A_{est}P_{est}$ matrix.                                                                                                                                                       |
| Unobserved links       | $UL = I_{max} - I_{obs}$              | Number of zeroes in the adjacency matrix.                                                                                                                                                                                                                                          |
| True unobserved links  | $UL* = I_{max} - I_{obs}$             | Number of zeroes in the augmented adjacency matrix that, eventually, includes unobserved species.                                                                                                                                                                                  |
| Forbidden links        | $FL$                                  | Number of links, which remain unobserved because of linkage constraints, irrespectively of sufficient sampling effort.                                                                                                                                                             |
| Observed Missing links | $ML = A_{obs}P_{obs} - I_{obs} - FL$  | Number of links, which may exist in nature but need more sampling effort and/or additional sampling methods to be observed.                                                                                                                                                        |
| True Missing links     | $ML* = A_{est}P_{est} - I_{est} - FL$ | Number of links, which may exist in nature but need more sampling effort and/or additional sampling methods to be observed. Augments $ML$ for the $A_{est}P_{est}$ matrix.                                                                                                         |

Table 2:

| Link type | Pollination      |                 |                             | Seed dispersal   |                 |                     |
|-----------|------------------|-----------------|-----------------------------|------------------|-----------------|---------------------|
|           | Zackenber<br>g   | Grundvad        | Arima<br>Valley             | Sta.<br>Virginia | Hato<br>Ratón   | Nava<br>Correhuelas |
| $I_{max}$ | 1891             | 646             | 522                         | 423              | 272             | 825                 |
| $I$       | 268<br>(0.1417)  | 212<br>(0.3282) | 185<br>(0.3544)             | 86<br>(0.1042)   | 151<br>(0.4719) | 181<br>(0.2194)     |
| $UL$      | 1507<br>(0.7969) | 434<br>(0.6718) | 337<br>(0.6456)             | 337<br>(0.4085)  | 169<br>(0.5281) | 644<br>(0.7806)     |
| $FL$      | 530<br>(0.3517)  | 107<br>(0.2465) | 218<br>(0.6469)             | 260<br>(0.7715)  | 118<br>(0.6982) | 302<br>(0.4689)     |
| $FL_P$    | 530<br>(1.0000)  | 94<br>(0.2166)  | 0<br>(0.0000)               | 120<br>(0.1624)  | 67<br>(0.3964)  | 195<br>(0.3028)     |
| $FL_S$    | ... (...)        | 8<br>(0.0184)   | 30<br>(0.0890)              | 140<br>(0.1894)  | 31<br>(0.1834)  | 46 (0.0714)         |
| $FL_A$    | ... (...)        | 5<br>(0.0115)   | 150<br>(0.445) <sup>a</sup> | ... (...)        | 20<br>(0.1183)  | 61 (0.0947)         |
| $FL_O$    | ... (...)        | ... (...)       | 38<br>(0.1128) <sup>b</sup> | ... (...)        | ... (...)       | 363<br>(0.5637)     |
| $ML$      | 977<br>(0.6483)  | 327<br>(0.7535) | 119<br>(0.3531)             | 77<br>(0.1042)   | 51<br>(0.3018)  | 342<br>(0.5311)     |

<sup>a</sup>, Lack of accessibility due to habitat uncoupling, i.e., canopy-foraging species vs. understory species.

<sup>b</sup>, Colour restrictions, and reward per flower too small relative to the size of the bird.

Jordano - Sampling networks

Table 3:

| Interaction | Sample 1 | Sample 2 | Sample 3 | ... | Sample $i$ |
|-------------|----------|----------|----------|-----|------------|
| A1 - P2     | 12       | 2        | 0        | ... | 6          |
| A1 - P2     | 0        | 0        | 0        | ... | 1          |
| ...         | ...      | ...      | ...      | ... | ...        |
| A5 - P3     | 5        | 0        | 1        | ... | 18         |
| A5 - P4     | 1        | 0        | 1        | ... | 3          |
| ...         | ...      | ...      | ...      | ... | ...        |
| $A_i - P_i$ | 1        | 0        | 1        | ... | 2          |

Table 4:

|                                  | Hato Ratón       | Nava Correhuelas | Zackenberg       |
|----------------------------------|------------------|------------------|------------------|
| $A$                              | 17               | 33               | 65               |
| $P$                              | 16               | 25               | 31               |
| $I_{max}$                        | 272              | 825              | 1891             |
| $N$                              | 3340             | 8378             | 1245             |
| $I$                              | 151              | 181              | 268              |
| $C$                              | 0.917            | 0.886            | 0.707            |
| $Chao1$                          | $263.1 \pm 70.9$ | $231.4 \pm 14.2$ | $509.6 \pm 54.7$ |
| $ACE$                            | $240.3 \pm 8.9$  | $241.3 \pm 7.9$  | $566.1 \pm 14.8$ |
| % <i>unobserved</i> <sup>a</sup> | 8.33             | 15.38            | 47.80            |

<sup>a</sup>, estimated with library Jade (R Core Development Team 2010, Chao *et al.* 2015)
